# Supplementary material
Source: publisher figshare collection journal article supplement (https://scielo.figshare.com/articles/dataset/_/9870785)
Supplement: Supplementary file 1 [file Table_1.xls]

## Sheet: Table_1
<b>Fases</b>	<b>Wollastonita</b>	<b>Brushita</b>	<b>β-TCP</b>	<b>HAp</b>
<strong>Grupo espacial</strong>	P-1	C 1 c 1	R3c	P63/m
<strong>Sistema Cristalino</strong>	Triclínica	Monoclínica	Romboédrica	Hexagonal
<strong>Rwp</strong>	11,71%
